# Supplementary material for: Sema4D silencing increases the sensitivity of nivolumab to B16-F10 resistant melanoma via inhibiting the PI3K/AKT signaling pathway
Source: PeerJ journal article supplement (doi:10.7717/peerj.15172), 2023-04-19

GAPDH (37kDa)

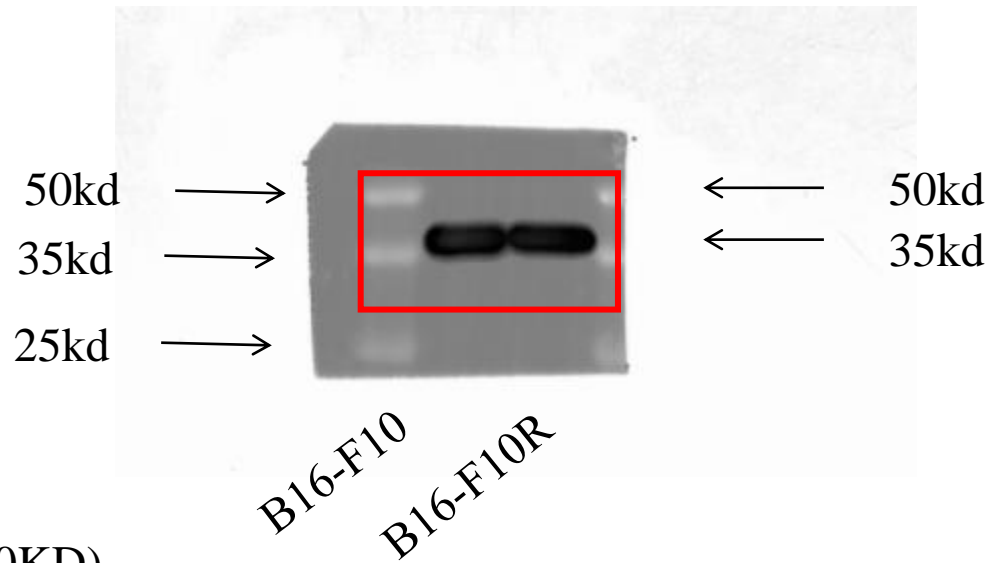

Sema4D (~120KD)

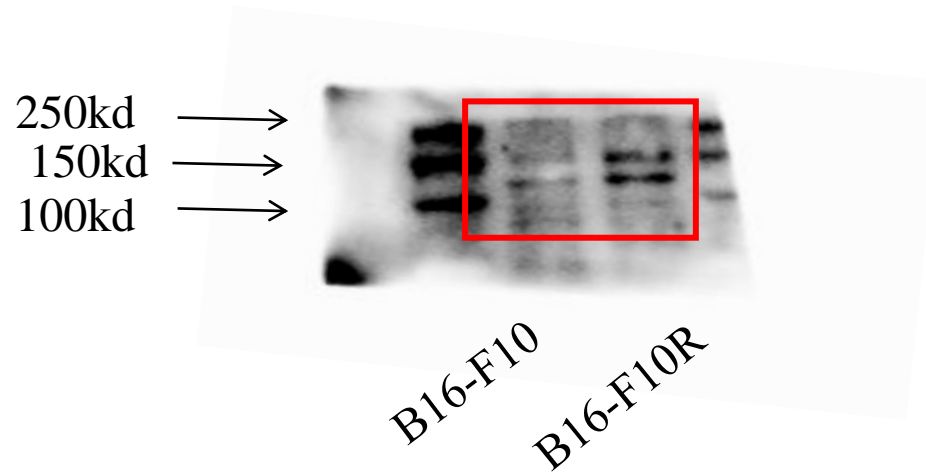

Plexin-B1 (~170KD)

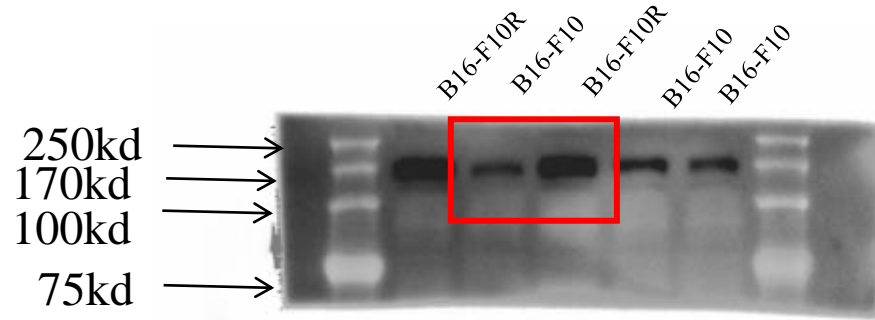

GAPDH (37kDa)

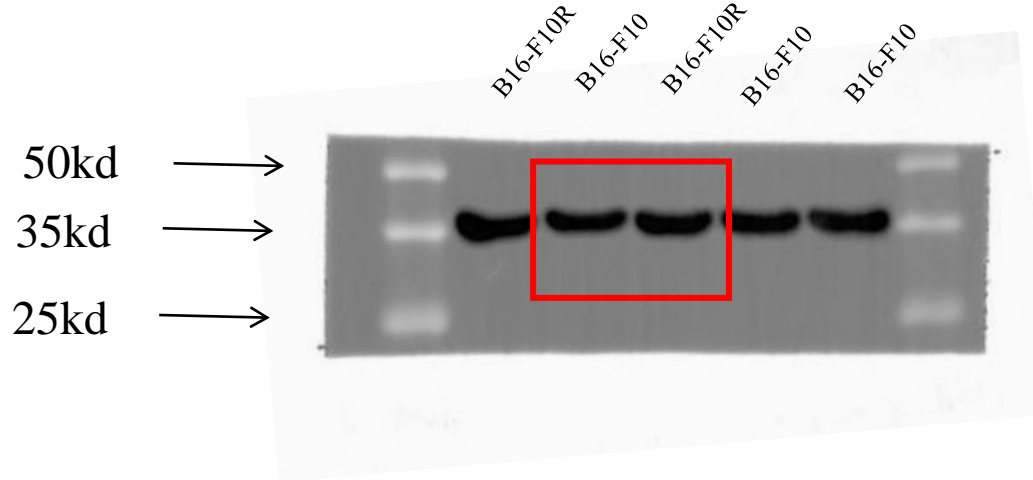

GAPDH (37kDa)

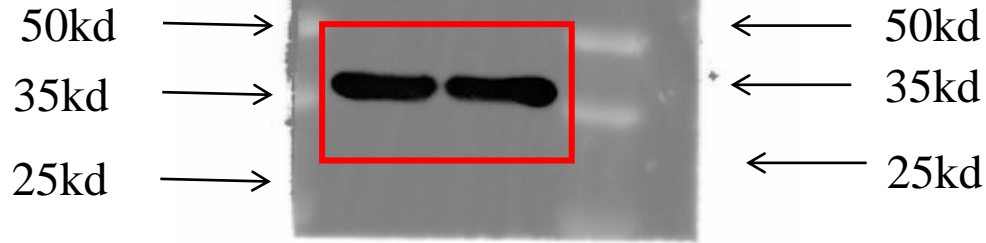

Sema4D-shRNA  
Sema4D-NC

PD-L1 (~55KD)

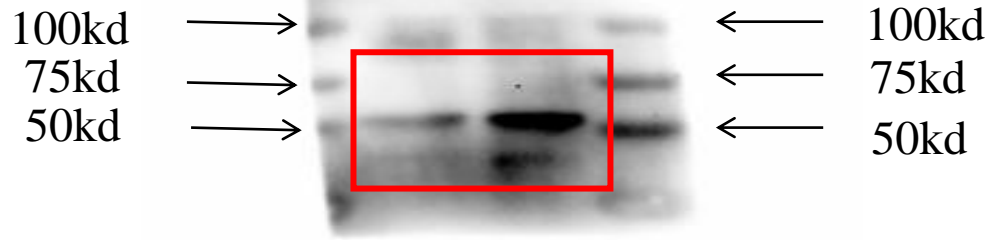

Sema4D-shRNA  
Sema4D-NC

PI3K (100 kDa)

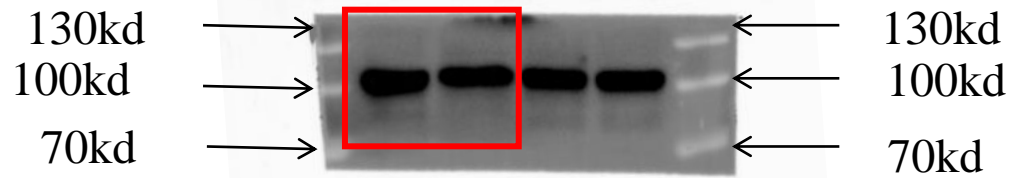

Sema4D-NC  
Sema4D-shRNA  
Sema4D-NC  
Sema4D-shRNA

p-PI3K (100 kDa)

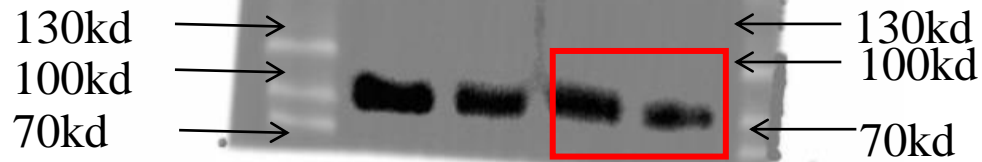

Sema4D-NC  
Sema4D-NC  
Sema4D-shRNA  
Sema4D-shRNA

AKT (62 kDa)

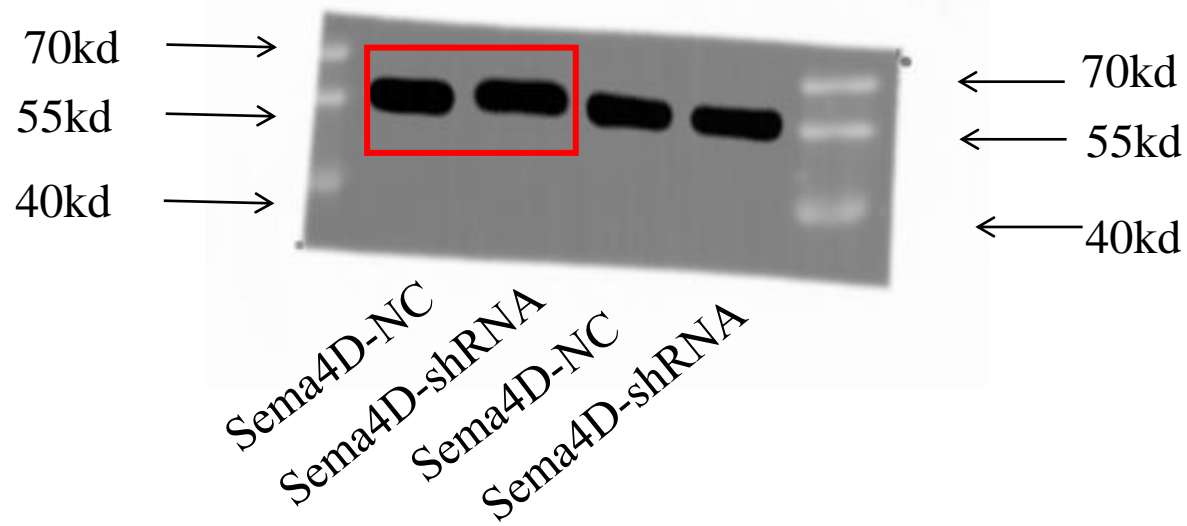

p-AKT (56 kDa)

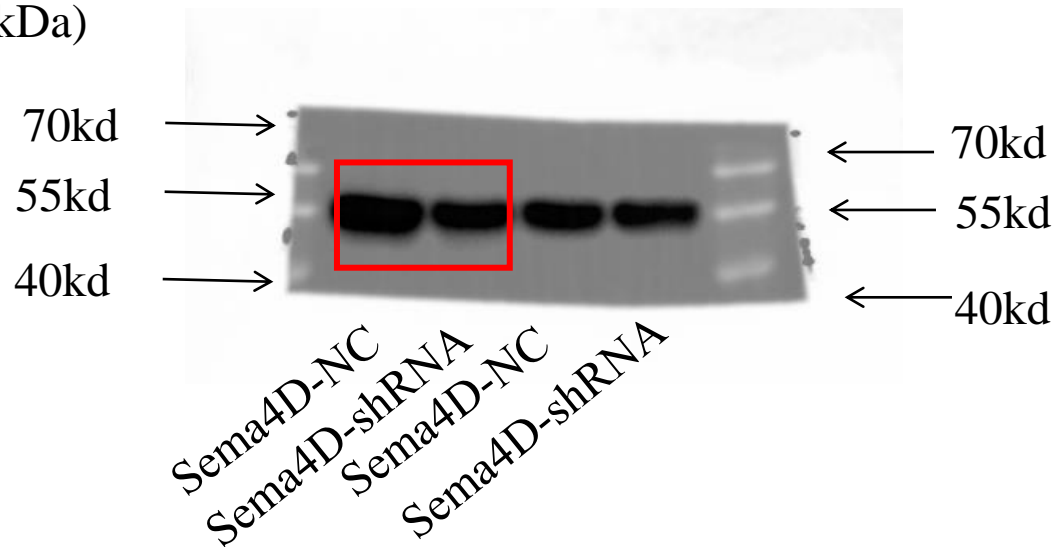

GAPDH (37kDa)

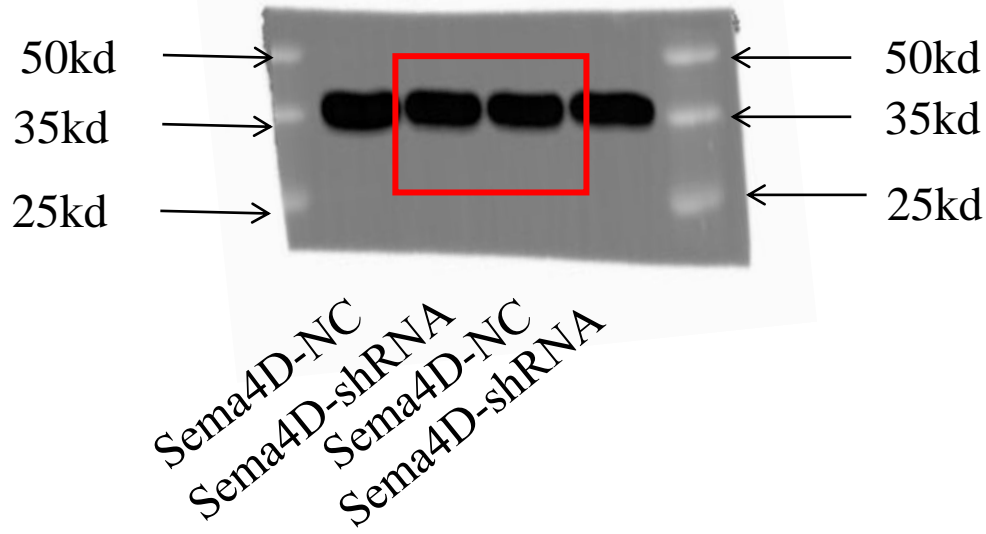

Supplement: Uncropped_western_blots.pdf [file Uncropped_western_blots.pdf]
